# Supplementary material for: Widespread Expression of Hedgehog Pathway Components in a Large Panel of Human Tumor Cells and Inhibition of Tumor Growth by GANT61: Implications for Cancer Therapy
Source: PubMed Central journal article supplement (PMC6163708; doi:10.3390/ijms19092682), 2018-09-10
Supplement: ijms-19-02682-s001.pdf [file ijms-19-02682-s001.pdf]

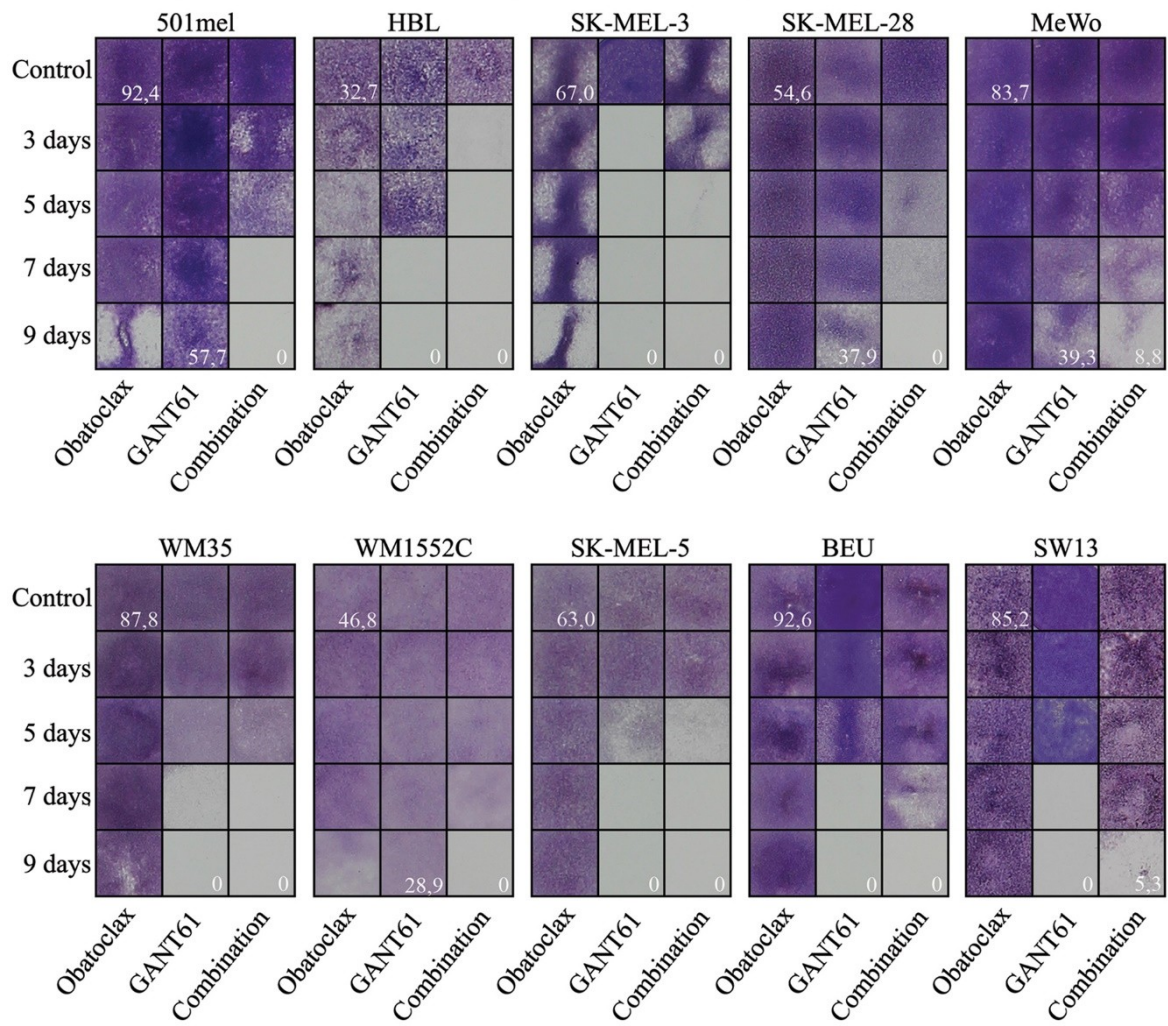

**Figure S1.** Synthetic lethality of most melanoma cell lines in a combined treatment. Sensitivity of melanoma cells to 20 $\mu$ M GANT61, 300 nM obatoclax, or their combination is shown. The picture is a Figure 4 from the published paper [29] shown with a kind permission of the publisher (Spandidos Publications).
